# Supplementary material for: Diet restriction in Ramadan and the effect of fasting on glucose levels in pregnancy
Source: Springer Nature journal article supplement (doi:10.1186/1756-0500-7-392), 2014-06-24

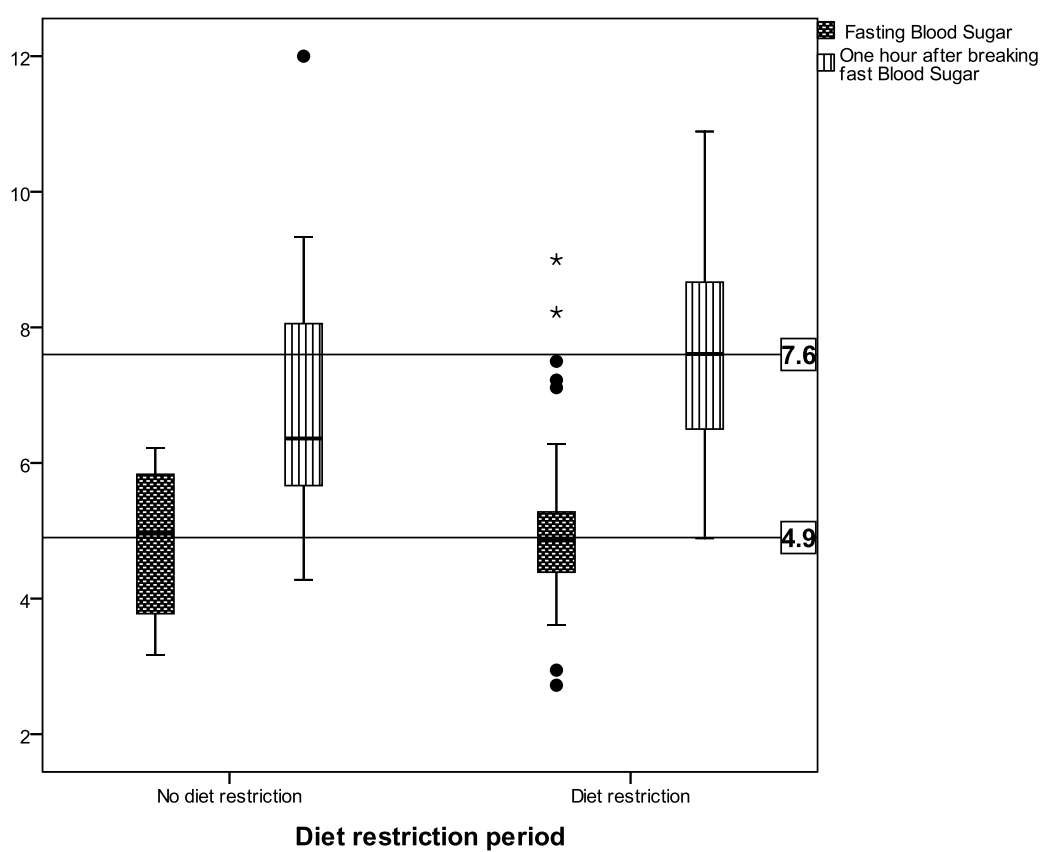

Supplement: 13104_2013_2937_MOESM1_ESM.pdf [file 13104_2013_2937_MOESM1_ESM.pdf]
